# Supplementary material for: Silica@proton-alginate microreactors: a versatile platform for cell encapsulation
Source: Royal Society of Chemistry journal article supplement (doi:10.1039/c4tb02020k), 2015-01-01
Supplement: c4tb02020k1.pdf [file c4tb02020k1.pdf]

## Supporting information

### Silica@proton-alginate microreactors: a versatile platform for cell encapsulation

Cecilia Spedalieri<sup>a</sup>, Clemence Sicard<sup>b,c</sup>, Mercedes Perullini<sup>a</sup>, Roberta Brayner<sup>c</sup>, Thibaud Coradin<sup>b</sup>, Jacques Livage<sup>b</sup>, Sara A. Bilmes<sup>a</sup> and Matias Jobbagy<sup>a,\*</sup>.

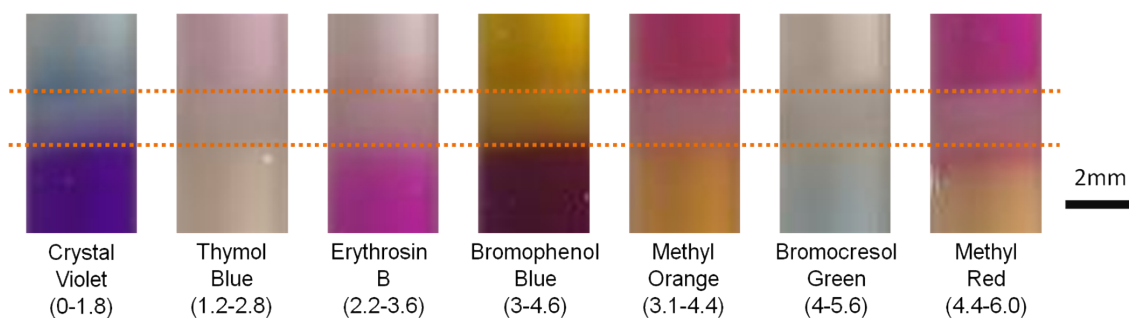

**Figure S1.** Digital images of samples after 21 min-long diffusion of proton (HCl 0.17M) through Na-Alg 3% wt in the presence of different acid-base indicators.

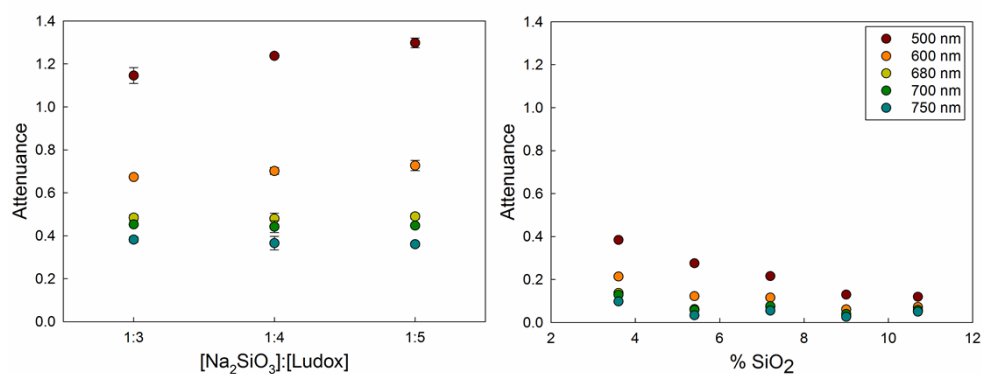

**Figure S2.** Attenuance of SL gels with 10.7% wt total SiO<sub>2</sub> content prepared with different silicate:Ludox mole ratios and a 10.7% wt total SiO<sub>2</sub> content (left) and TAFR gels with different total SiO<sub>2</sub> content (right) recorder at representative wavelengths.

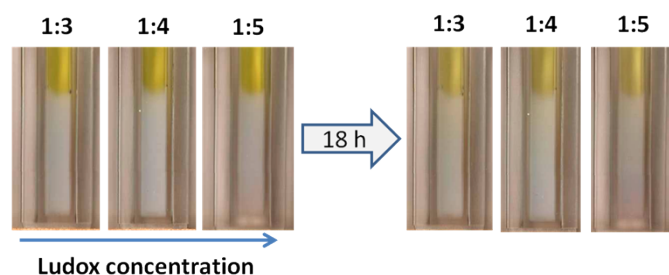

**Figure S3.** SL hydrogels with 10.7% total  $\text{SiO}_2$  and increasing  $\text{Na}_2\text{SiO}_3$ :Ludox<sup>®</sup> concentration left in contact with 0.5 mL of  $\text{HAuCl}_4$  0.02M. Images of the hydrogels at initial time and 18 h are shown. After two weeks, no further reduction was observed.

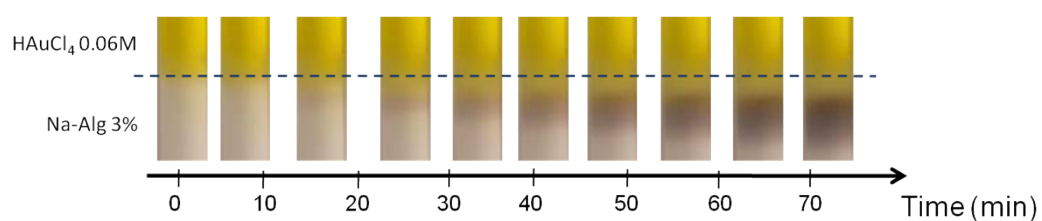

**Figure S4.** Digital image of  $\text{HAuCl}_4$  0.06 M solution diffusing towards Na-Alg 3% wt.

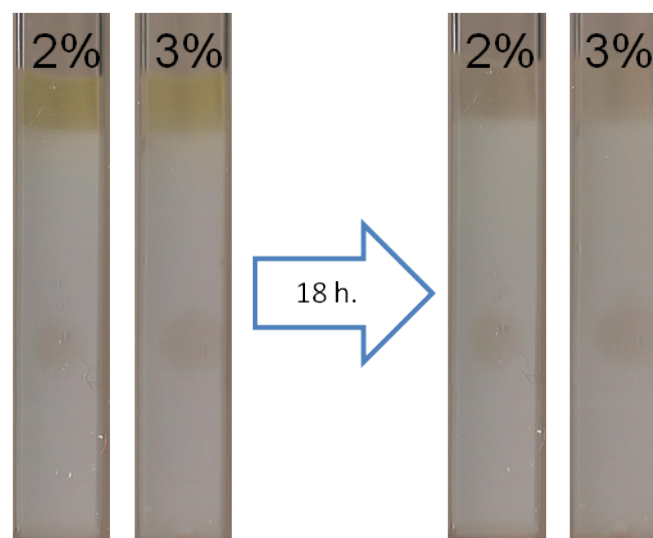

**Figure S5.** Digital image of  $\text{HAuCl}_4$  0.06 M solution diffusing towards SL 1:3 hydrogels loaded with H-Alg (2 and 3%).

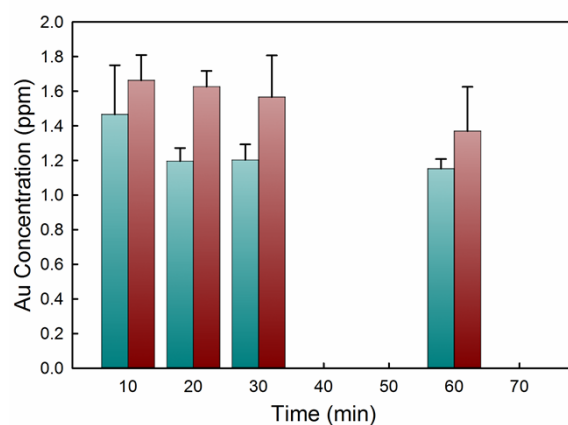

**Figure S6.** Total Au(III) concentration in alginate gels (2% wt, blue; 3% wt, red) exposed to  $\text{HAuCl}_4$  0.01 M for increasing times.

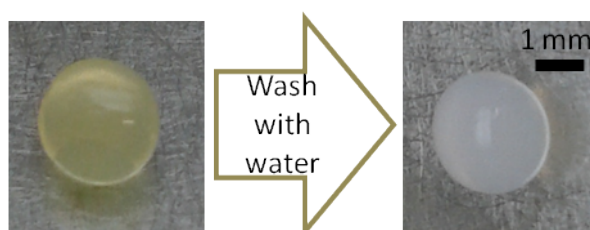

**Figure S7.** Image of an alginate gel exposed to  $\text{HAuCl}_4$  0.02 M for 5 minutes (left) and after washing in pure water (right).

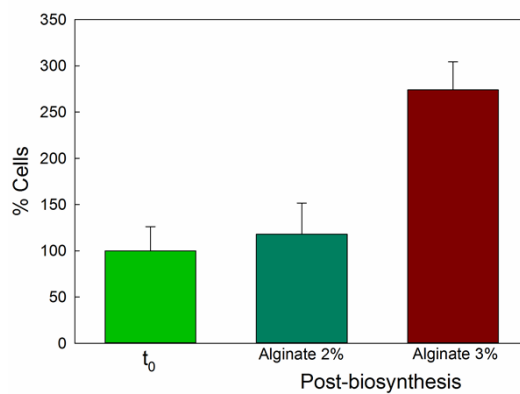

**Figure S8.** Viability of *C. vulgaris* entrapped in SL hydrogels (Silicate:Ludox<sup>®</sup> 1:3) and H-Alg (2-3%), after exposure to  $\text{HAuCl}_4$  0.02M for 72h.

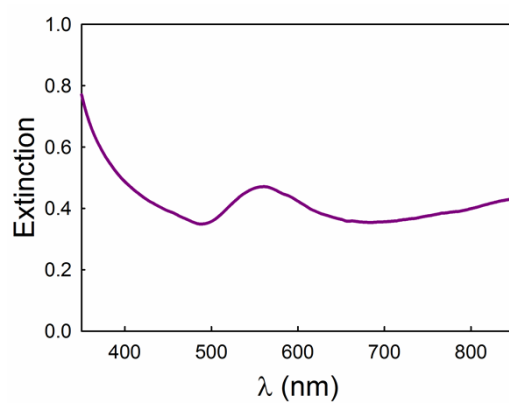

**Figure S9.** UV-Vis absorption of Au nanoparticles obtained from SL hydrogel loaded with a *C. vulgaris* culture ( $7 \times 10^4$  cells/mL) exposed to a nominal  $\text{HAuCl}_4$   $10^{-3}$  M for 24 h.
